# Supplementary material
Source: Elsevier journal article supplement (https://www.sciencedirect.com/science/article/pii/S2605073021000158)
Supplement: mmc1 [file S2605073021000158:mmc1.doc]

Estimado Editor:

Reciba un cordial saludo, a continuación envío los cambios sugeridos según sus comentarios:

- Se incluyó que dichos compuestos no solo es visto en Chile, sino en la mayoría de países del mundo. Asimismo, la legislación es diferente en cada país, pero se guían según la OMS.
- Se agregó la cantidad que debe ser consumida en los productos, en caso tengan aspartamo y tartrazina.
- Se agregó propuestas en el quinto párrafo.
- Se cambió la cuarta referencia por una más indicada.

Se finalizó de subsanar lo sugerido por el Comité editorial.

Atentamente,

El autor
